# Supplementary material for: Multi-strain probiotics alleviate loperamide-induced constipation by adjusting the microbiome, serotonin, and short-chain fatty acids in rats
Source: PubMed Central journal article supplement (PMC10272585; doi:10.3389/fmicb.2023.1174968), 2023-06-02
Supplement: Data_Sheet_1.pdf [file Data_Sheet_1.pdf]

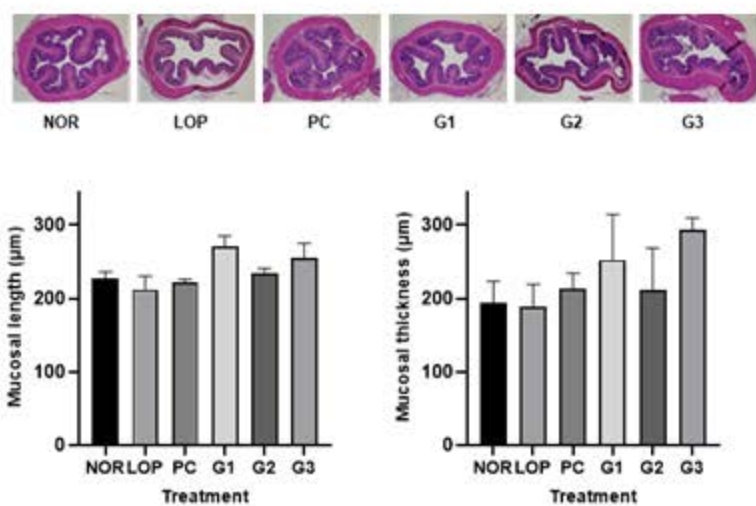

**Supplementary Figure S1.** Intestinal mucosal length and thickness after multi-strain probiotics Consti-Biome administration. The upper photograph shows the stained intestinal mucosa. The left graph shows the length of the mucosa and the right shows the thickness of the mucosa.

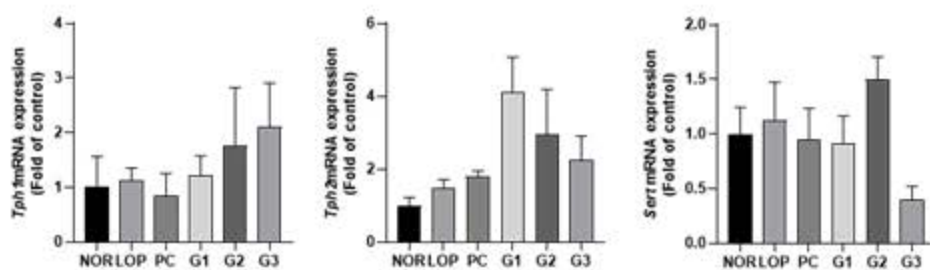

**Supplementary Figure S2.** mRNA expression related to serotonin according to constipation induction and multi-strain probiotics Consti-Biome treatment. mRNA expression level in the colon of normal control (NOR), loperamide administration (LOP), positive control (PC), low concentration multi-strain probiotics administration (G1,  $2 \times 10^8$  cfu/ml), medium concentration multi-strain probiotics administration (G2,  $2 \times 10^9$  cfu/ml), and high concentration probiotic administration (G3,  $2 \times 10^{10}$  cfu/ml) groups were measured 2 weeks after the multi-strain probiotics' treatment. Data are **mean  $\pm$  SEM** of 7 animals in *Tph1*, *Tph2* and *Sert*.

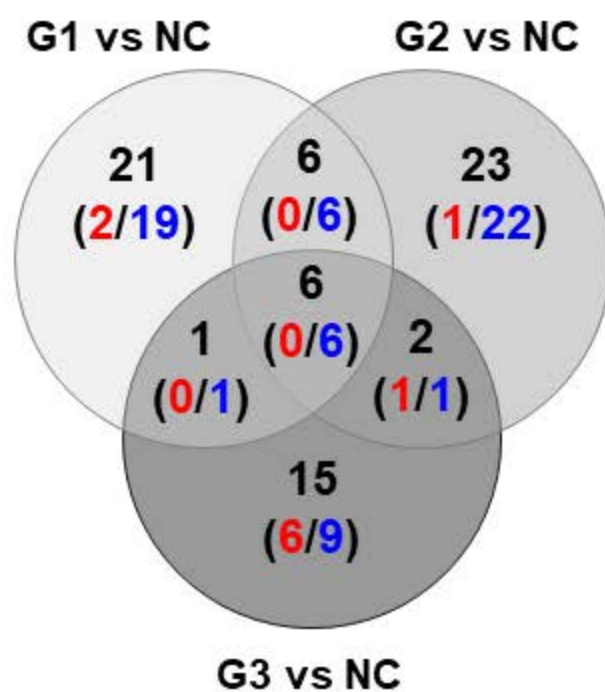

**Supplementary Figure S3.** The metabolites that show specific or common abundance pattern in multi-strain probiotics treatment groups compared to loperamide administration (LOP) group. The significantly difference of comparing from the LOP as per Mann-whitney U test. Red color means up-regulation at treatment group and Blue color means down-regulation at treatment group compared to LOP group, respectively.

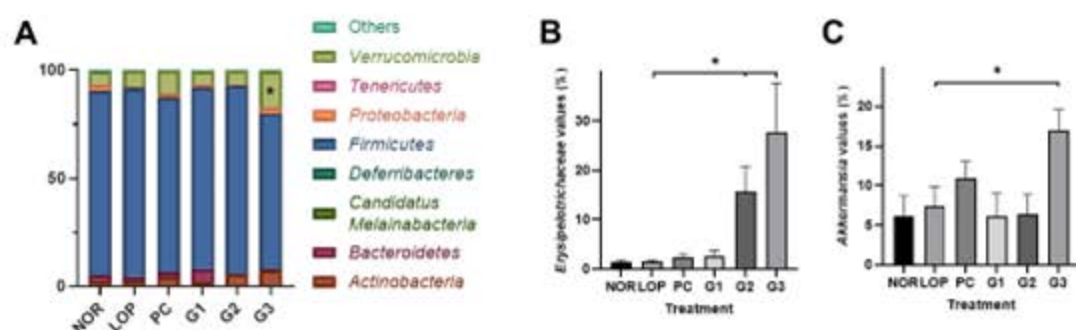

**Supplementary Figure S4.** Microbiome changes by induction of constipation and intake of multi-strain probiotics Consti-Biome. A is the representative phylum increase and decrease. B and C are variations of the family *Erysipelotrichaceae* and the genus *Akkermansia*, respectively. Microbiome of normal control (NOR), loperamide administration (LOP), positive control (PC), low concentration multi-strain probiotics administration (G1,  $2 \times 10^8$  cfu/ml), medium concentration multi-strain probiotics administration (G2,  $2 \times 10^9$  cfu/ml), and high concentration probiotic administration (G3,  $2 \times 10^{10}$  cfu/ml) groups were analyzed with fecal samples 2 weeks after treatment with multi-strain probiotics. Data are mean  $\pm$  SEM of 5 animals in B and C. \* $p < 0.05$ , significantly different from the LOP as per unpaired t test.

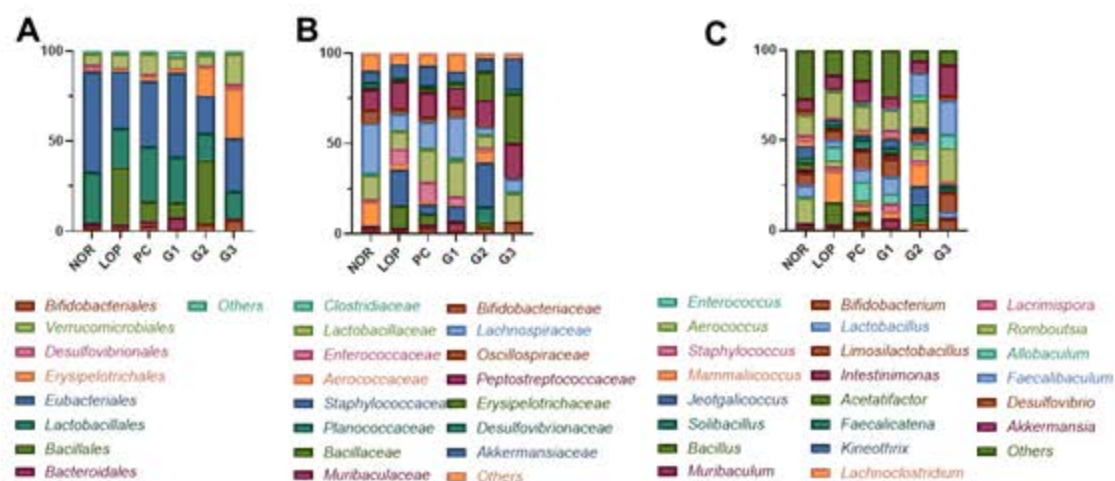

**Supplementary Figure S5.** Microbiome changes by induction of constipation and intake of multi-strain probiotics Consti-Biome. A, B, and C represent the order, the family, and the genus, respectively. Microbiome of normal control (NOR), loperamide administration (LOP), positive control (PC), low concentration multi-strain probiotics administration (G1,  $2 \times 10^8$  cfu/ml), medium concentration multi-strain probiotics administration (G2,  $2 \times 10^9$  cfu/ml), and high concentration probiotic administration (G3,  $2 \times 10^{10}$  cfu/ml) groups were analyzed with fecal samples 2 weeks after treatment with multi-strain probiotics.

**Supplementary Table 1.** Summary of univariate statistics on G1 vs LOP

| Mouse cecal metabolite (significantly different in G1) | Fold change |
|--------------------------------------------------------|-------------|
| 2'-Deoxyuridine                                        | 5.1744      |
| L-Aspartic acid                                        | 1.8973      |
| 3-Hydroxyanthranilic acid                              | 0.5313      |
| Choline                                                | 0.5242      |
| Gluconic acid                                          | 0.5044      |
| D-(-)-Ribose                                           | 0.4811      |
| 3-Methylglutaric acid                                  | 0.4748      |
| N3,N4-Dimethyl-L-arginine                              | 0.4624      |
| Skatole                                                | 0.4600      |
| L-Serine                                               | 0.4518      |
| DL-Tryptophan                                          | 0.4465      |
| Creatine                                               | 0.4388      |
| Cholecalciferol                                        | 0.4383      |
| (2R)-2,3-Dihydroxypropanoic acid                       | 0.4316      |
| 6-Methylquinoline                                      | 0.4268      |
| L-Phenylalanine                                        | 0.4167      |
| 2'-O-Methylguanosine                                   | 0.3883      |
| Oleoyl ethanolamide                                    | 0.3807      |
| 4'-Methoxyacetophenone                                 | 0.3787      |
| Cytidine                                               | 0.3771      |
| Uracil                                                 | 0.3768      |
| D-Sphingosine                                          | 0.3482      |
| Xanthurenic acid                                       | 0.3475      |
| N,N-Dimethylsphingosine                                | 0.2759      |
| Methenolone                                            | 0.2738      |
| DL-Malic acid                                          | 0.2158      |
| Salicylic acid                                         | 0.2102      |
| Fumaric acid                                           | 0.2043      |
| Palmitoylcarnitine                                     | 0.1754      |
| N,N-Diethylethanolamine                                | 0.1524      |
| Citric acid                                            | 0.1391      |
| Creatinine                                             | 0.0580      |
| Leucine                                                | 0.0271      |
| L-Valine                                               | 0.0038      |

P-value were calculated based on Mann-whitney u-test

**Supplementary Table 2.** Summary of univariate statistics on G2 vs LOP

| Mouse cecal metabolite (significantly different in G2) | Fold change |
|--------------------------------------------------------|-------------|
| 3-indole butyric acid                                  | 16.9055     |
| Isoferulic acid                                        | 2.6747      |
| DL-Lysine                                              | 0.7242      |
| N-Acetylneuraminic acid                                | 0.6880      |
| Pipecolic acid                                         | 0.6634      |
| $\beta$ -Alanine                                       | 0.6116      |
| Trigonelline                                           | 0.6039      |
| $\beta$ -D-Glucopyranuronic acid                       | 0.5954      |
| Choline                                                | 0.5269      |
| L-(+)-Citrulline                                       | 0.5172      |
| 5-Aminovaleric acid                                    | 0.5166      |
| Desoxycortone                                          | 0.5111      |
| L-(+)-Lactic acid                                      | 0.4969      |
| DL-Carnitine                                           | 0.4957      |
| Glycerophospho-N-palmitoyl ethanolamine                | 0.4422      |
| 6-Hydroxycaproic acid                                  | 0.4351      |
| Pantothenic acid                                       | 0.4300      |
| (2R)-2,3-Dihydroxypropanoic acid                       | 0.4198      |
| L-(-)-Methionine                                       | 0.4178      |
| N-Acetyl-D-alloisoleucine                              | 0.4172      |
| N3,N4-Dimethyl-L-arginine                              | 0.4166      |
| 3-Methylglutaric acid                                  | 0.4137      |
| L-Cysteinesulfinic acid                                | 0.4036      |
| Uracil                                                 | 0.3950      |
| 5 $\alpha$ -Pregnan-3,20-dione                         | 0.3923      |
| Nicotinic acid                                         | 0.3862      |
| Gluconic acid                                          | 0.3651      |
| 2'-O-Methylguanosine                                   | 0.3492      |
| $\delta$ -Gluconic acid $\delta$ -lactone              | 0.3388      |
| Xanthine                                               | 0.3333      |
| Spermine                                               | 0.3173      |
| Oleoyl ethanolamide                                    | 0.2555      |
| Fumaric acid                                           | 0.2170      |
| DL-Malic acid                                          | 0.2165      |
| Xanthurenic acid                                       | 0.1829      |
| (+/-)11-HETE                                           | 0.1541      |
| Citric acid                                            | 0.1091      |

P-value were calculated based on Mann-whitney u-test

**Supplementary Table 3. Summary of univariate statistics on G3 vs LOP**

| <b>Mouse cecal metabolite (significantly different in G3)</b> | <b>Fold change</b> |
|---------------------------------------------------------------|--------------------|
| Isoferulic acid                                               | 3.9411             |
| L-Histidine                                                   | 3.8110             |
| D-(-)-Glutamine                                               | 2.7685             |
| Butyrate                                                      | 1.9731             |
| Valerate                                                      | 1.7327             |
| Propionate                                                    | 1.7179             |
| Acetate                                                       | 1.4719             |
| 3-Hydroxyanthranilic acid                                     | 0.5003             |
| Methylimidazoleacetic acid                                    | 0.4794             |
| Suberic acid                                                  | 0.4259             |
| Gluconic acid                                                 | 0.4181             |
| 3-Methylglutaric acid                                         | 0.3871             |
| Fumaric acid                                                  | 0.3302             |
| 16-Hydroxyhexadecanoic acid                                   | 0.3155             |
| Spermine                                                      | 0.3084             |
| Uracil                                                        | 0.3062             |
| Quinolinic acid                                               | 0.2862             |
| Xanthurenic acid                                              | 0.2502             |
| Cytosine                                                      | 0.2412             |
| Phenylpyruvic acid                                            | 0.2179             |
| Kynurenic acid                                                | 0.2159             |
| Xanthosine                                                    | 0.1705             |
| 2'-O-Methylguanosine                                          | 0.1522             |
| 2-Oxoglutaric acid                                            | 0.1000             |

**P-value were calculated based on Mann-whitney u-test**



**Supplementary Table 4.** Summary of statistics of short chain fatty acids

| <b>Mouse cecal metabolite</b>          |                |
|----------------------------------------|----------------|
| <b>Short chain fatty acids (SCFAs)</b> | <b>p-value</b> |
| Acetic acid                            | 0.097          |
| Propionic acid                         | 0.091          |
| Butyric acid                           | 0.142          |
| Iso-butyric acid                       | 0.279          |
| Valeric acid                           | 0.254          |
| Iso-valeric acid                       | 0.338          |

**P-value** were calculated based on Kruskal-Wallis test.
